# Supplementary material
Source: Springer Nature journal article supplement (https://www.springermedizin.de/resource/supplementary/13014_2013_941_MOESM4_ESM.pdf/9634470)

**a**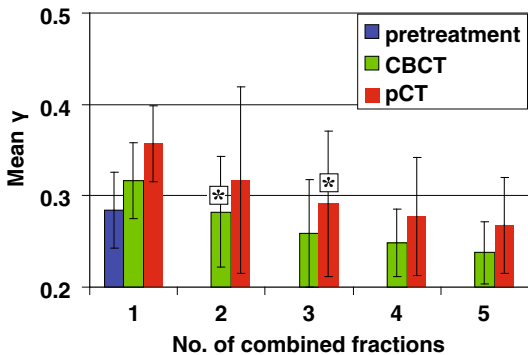**b**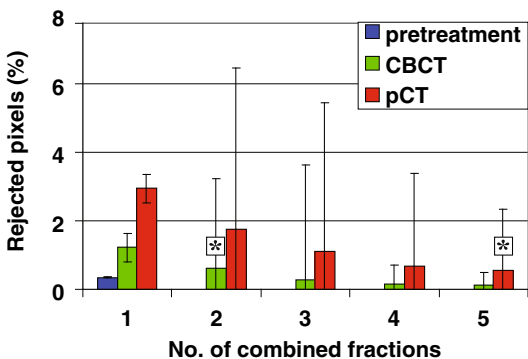**c**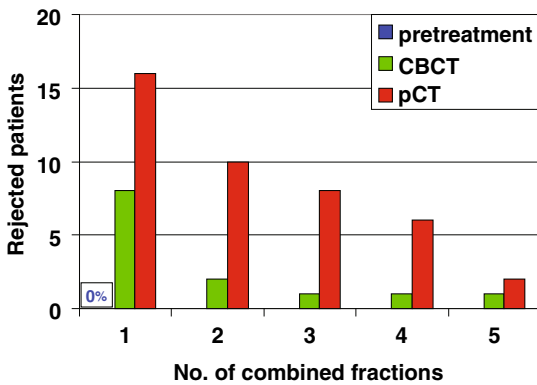

Supplement: MOESM4 [file 9634470]
